# Supplementary material for: Fabrication of a Low-Kink-Radius Bilayer Vascular Scaffold Incorporating a TPU Stent Fabricated via Melt Electrowriting and an Electrospun PCL/PU/gelatin Layer
Source: Research Square preprint supplement (doi:10.21203/rs.3.rs-6835995/v1), 2025-06-19
Supplement: Supplementary file 1 [file f2eaa8ed747538f90855a986.docx]

**Supplementary information:**
**Fabrication of a Low-Kink-Radius Bilayer Vascular Scaffold Incorporating a TPU Stent Fabricated via Melt Electrowriting and an Electrospun PCL/PU/Gelatin Layer**

Mohamad Shahverdi a,1, Hossein Shaygani b,c,1, Mohamadreza Soltani b,c, Kayvan Dadkhah a, Seyed Mohammad Hossein Rezaei Demneh b,c, Kaivan Mohammadi a *, Amir Shamloo b,c **

a Advanced Manufacturing Laboratory, School of Mechanical Engineering, Sharif University of Technology, Azadi Ave., Tehran, Iran

b Nano BioTechnology Laboratory, School of Mechanical Engineering, Sharif University of Technology, Tehran, Iran

c Stem Cell and Regenerative Medicine Institute, Sharif University of Technology, Tehran 7 11155-9161, Iran.

1 Equal contribution

*Corresponding Author: Dr. K. Mohammadi, School of Mechanical Engineering, Sharif University of Technology, Azadi Ave., Tehran, IRAN, Tel: 98-21-66165585, Email: [kaivan.mohammadi@sharif.edu](mailto:kaivan.mohammadi@sharif.edu)

**Corresponding Author: Dr. A. Shamloo, School of Mechanical Engineering, Sharif University of 13 Technology, Azadi Ave., Tehran, IRAN, Tel: 98-21-66165691, Fax: 98-21-66165599, email: 14 [shamloo@sharif.edu](mailto:shamloo@sharif.edu)

**Supplementary note 1:**

**Please Double click (Notepad file)**

**Figure S1:**


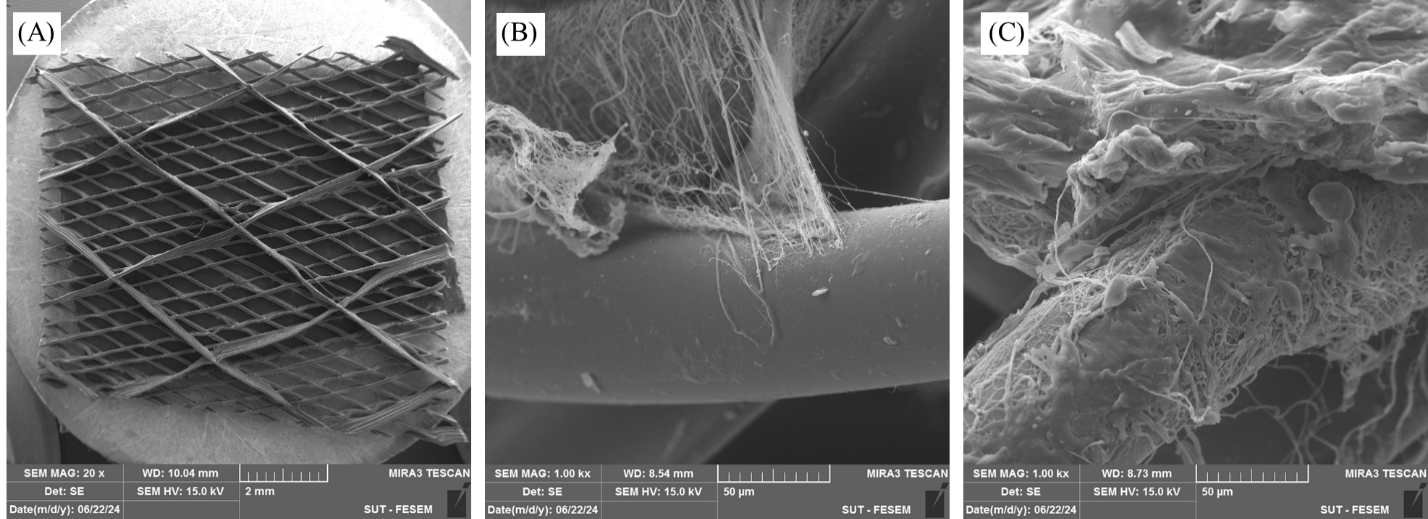


**Fig. S1**: FE-SEM images of the MEW Integrated layer (A), Adhesion of co-electrospun/MEW
